# Supplementary material
Source: PubMed Central journal article supplement (PMC3123086)
Supplement: supp_M111.231167_jbc.M111.231167-1.pdf [file supp_M111.231167_jbc.M111.231167-1.pdf]

## SUPPLEMENTAL DATA

### CHARGE REQUIREMENTS FOR PROTON GRADIENT-DRIVEN TRANSLOCATION OF ANTHRAX TOXIN

Michael J. Brown,<sup>1</sup> Katie L. Thoren,<sup>2</sup> Bryan A. Krantz<sup>1,2,3</sup>

From Departments of Molecular & Cell Biology<sup>1</sup>, Chemistry<sup>2</sup>, and the California Institute for Quantitative Biosciences<sup>3</sup>,

University of California, Berkeley, CA, 94720, U.S.A.

Running head: Proton-gradient driven translocation

Address correspondence to: Bryan A. Krantz, University of California, 476 Stanley Hall #3220, Berkeley, CA 94720-3220. E-mail: [bakrantz@berkeley.edu](mailto:bakrantz@berkeley.edu)

#### Experimental Procedures

*Equilibrium chemical denaturation titrations.* Guanidinium chloride titrations carried out on LF<sub>N</sub> mutants in 10 mM sodium phosphate, 1 M glucose, pH 7.5, 20 °C as described (1,2). Each titration point is monitored by circular dichroism (CD) spectroscopy at 222 (±2) nm using a Jasco J-810 spectropolarimeter (Easton, MD). The CD-probed curves fit to a four-state thermodynamic model ( $N \leftrightarrow I \leftrightarrow J \leftrightarrow U$ ), where native ( $N$ ), two intermediates ( $I$  and  $J$ ), and an unfolded ( $U$ ) state are populated (2). We use the thermodynamic difference between the  $N$  and  $I$  states ( $\Delta G_{NI}$ ) to assess the stability of the protein.

#### REFERENCES

1. Thoren, K. L., Worden, E. J., Yassif, J. M., and Krantz, B. A. (2009) *Proc. Natl Acad. Sci. U.S.A.* **106**, 21555-21560
2. Krantz, B. A., Trivedi, A. D., Cunningham, K., Christensen, K. A., and Collier, R. J. (2004) *J. Mol. Biol.* **344**, 739-756

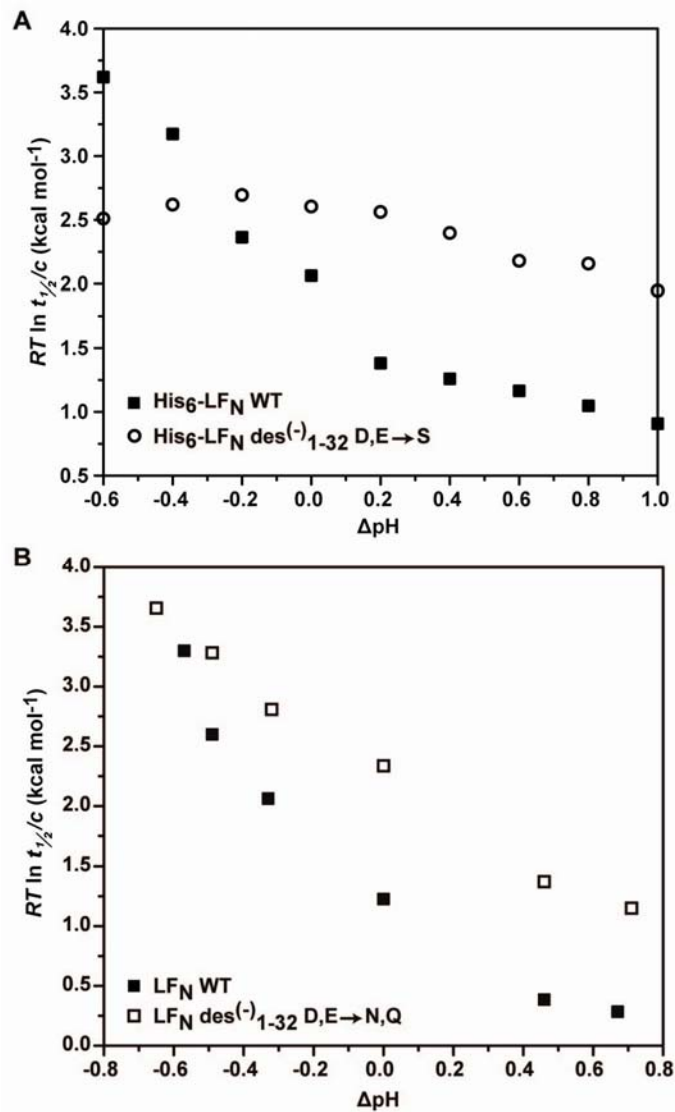

**Fig. S1.** LF<sub>N</sub> des<sup>(-)</sup><sub>1-32</sub> has reduced  $\Delta\text{pH}$  dependence relative to LF<sub>N</sub> WT regardless of replacement residue or His<sub>6</sub> tag. The LF<sub>N</sub> des<sup>(-)</sup><sub>1-32</sub> construct changes the aspartates and glutamates in LF<sub>N</sub>'s presequence to (A) serines or (B) their respective nonpolar analogs asparagines and glutamines. Additionally, in (B) the His<sub>6</sub> tags have been removed from the proteins.  $\Delta G^\ddagger$  versus  $\Delta\text{pH}$  profiles are shown for (A) His<sub>6</sub>-LF<sub>N</sub> WT (■) and His<sub>6</sub>-LF<sub>N</sub> des<sup>(-)</sup><sub>1-32</sub> D,E→S (○) or (B) LF<sub>N</sub> WT (■) and LF<sub>N</sub> des<sup>(-)</sup><sub>1-32</sub> D,E→N,Q. In both cases, conditions are  $\Delta\Psi = 60$  mV and  $\text{pH}_{\text{cis}} = 5.6$ .

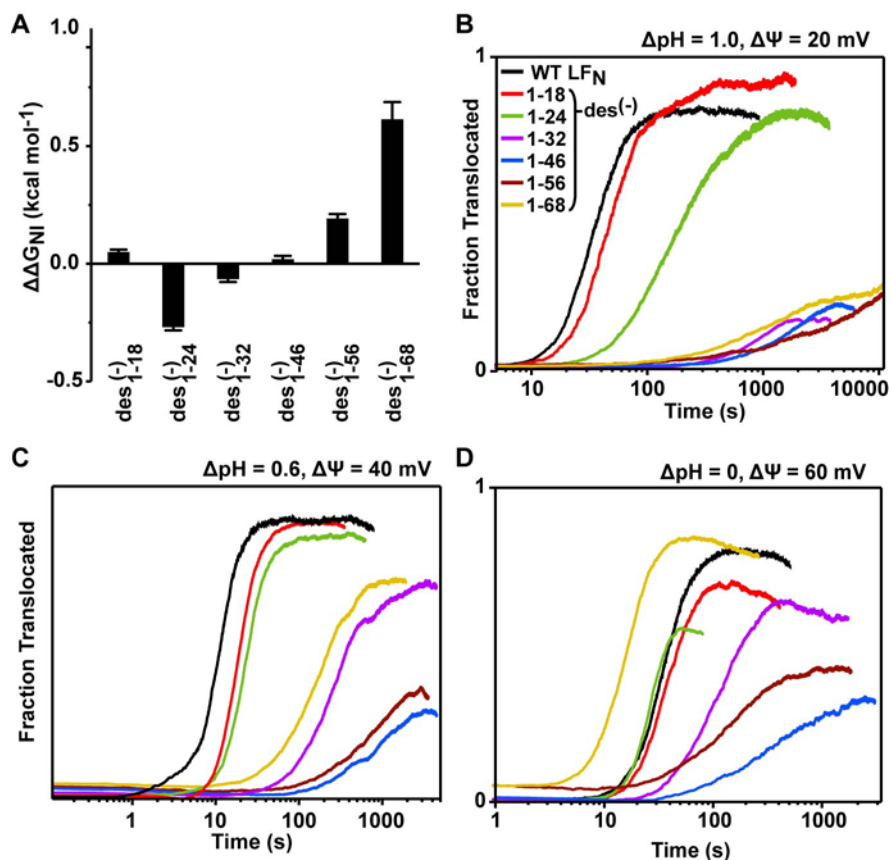

**Fig. S2.** Acidic residues within LFN's folded domain are also critical to  $\Delta pH$ -driven translocation. (A) The change in protein stability ( $\Delta\Delta G_{NI}$ ) for the His<sub>6</sub>-LFN des<sup>(-)</sup> series relative to His<sub>6</sub>-LFN WT estimated from guanidinium chloride denaturant melts probed by circular dichroism. The thermodynamic quantity,  $\Delta\Delta G_{NI}$ , compares difference in the *N* and *I* state free energies of the mutant (MUT) to WT as follows:  $\Delta\Delta G_{NI} = \Delta G_{NI}(\text{MUT}) - \Delta G_{NI}(\text{WT})$ . Error bars are the mean  $\pm$  s.d. ( $n = 2$ ). (B-D) Translocation records for His<sub>6</sub>-LFN WT (black), His<sub>6</sub>-LFN des<sup>(-)</sup><sub>1-18</sub> (red), His<sub>6</sub>-LFN des<sup>(-)</sup><sub>1-24</sub> (green), His<sub>6</sub>-LFN des<sup>(-)</sup><sub>1-32</sub> (purple), His<sub>6</sub>-LFN des<sup>(-)</sup><sub>1-46</sub> (blue), His<sub>6</sub>-LFN des<sup>(-)</sup><sub>1-56</sub> (brown), and His<sub>6</sub>-LFN des<sup>(-)</sup><sub>1-68</sub> (gold) under different  $\Delta pH$  and  $\Delta\Psi$  driving force conditions: (B)  $\Delta pH = 1.0$ ,  $pH_{cis} = 5.6$ ,  $\Delta\Psi = 20$  mV; (C)  $\Delta pH = 0.6$ ,  $pH_{cis} = 5.6$ ,  $\Delta\Psi = 40$  mV; and (D)  $\Delta pH = 0$ ,  $pH_{cis} = 5.6$ , and  $\Delta\Psi = 60$  mV, as summarized in Fig. 4B.

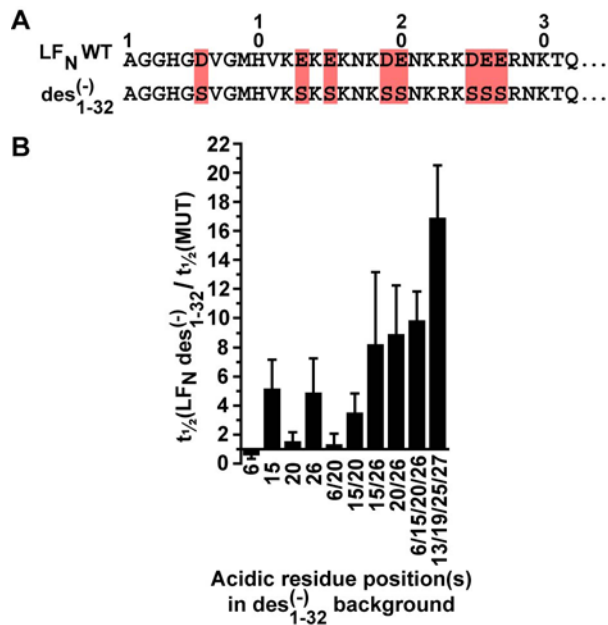

**Fig S3.** Acidic-residue positions in LF<sub>N</sub>'s presequence are most critical to ΔpH-driven translocation. Acidic residues were reintroduced in their wild-type positions into the His<sub>6</sub>-LF<sub>N</sub> des<sup>(-)</sup><sub>1-32</sub> background. (A) The sequences of the first 32 residues of LF<sub>N</sub> WT and LF<sub>N</sub> des<sup>(-)</sup><sub>1-32</sub> are shown, where acidic residues in the WT sequence are shaded red. (B) The relative translocation  $t_{1/2}$  times for ΔpH-driven translocation are given as the ratio  $t_{1/2}(\text{des}^{(-)}_{1-32}) / t_{1/2}(\text{MUT})$ , where the mutant (MUT) is the construct with the reintroduced acidic residue(s). The numbers on the  $x$ -axis indicate the position(s) in which acidic residues are reintroduced into the His<sub>6</sub>-LF<sub>N</sub> des<sup>(-)</sup><sub>1-32</sub> backgrounds. Multisite acidic-residue reintroductions are indicated with slashes separating the residue number. ΔpH-driven translocation conditions were ΔpH = 0.6, pH<sub>cis</sub> = 5.6, and Δψ = 35 mV. Error bars are the mean ± s.d. ( $n = 2$ ). For reference, the relative translocation time for LF<sub>N</sub> WT compared to LF<sub>N</sub> des<sup>(-)</sup><sub>1-32</sub>,  $t_{1/2}(\text{des}^{(-)}_{1-32}) / t_{1/2}(\text{WT})$ , is 14.8 (±3.0).
